# Supplementary material for: Resemblance of the Recurrence Patterns in Primary Systemic, Primary Surgery and Secondary Oncoplastic Surgery
Source: MDPI journal article supplement (doi:10.3390/curroncol29110698), 2022-11-17

General analysis of the groups

Surgery to recurrence (t2/t3)  
group 1 (n=390), group 2 (n=72), group 3 (n=19)

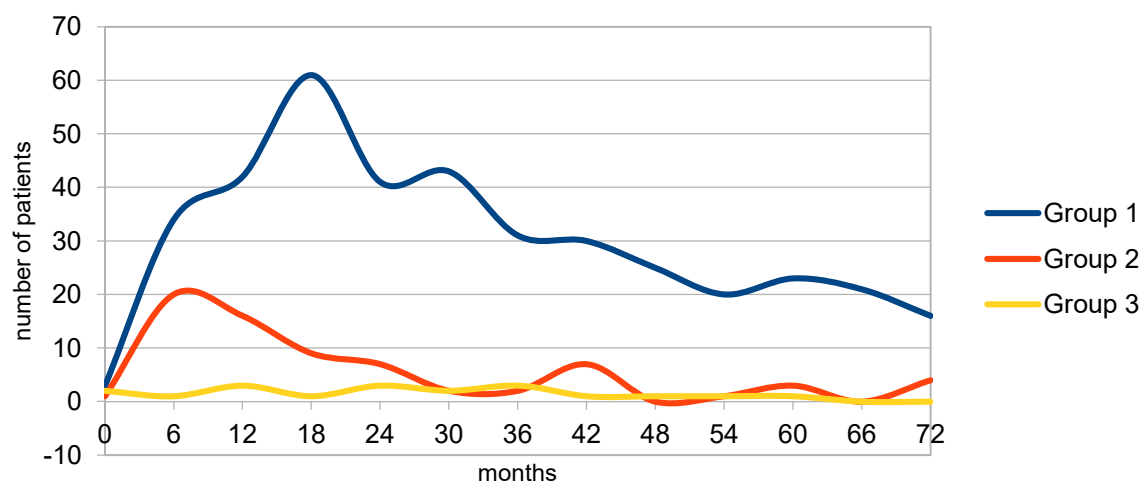

Diagnose to recurrence (t1)  
group 1 (n=390), group 2 (n=72)

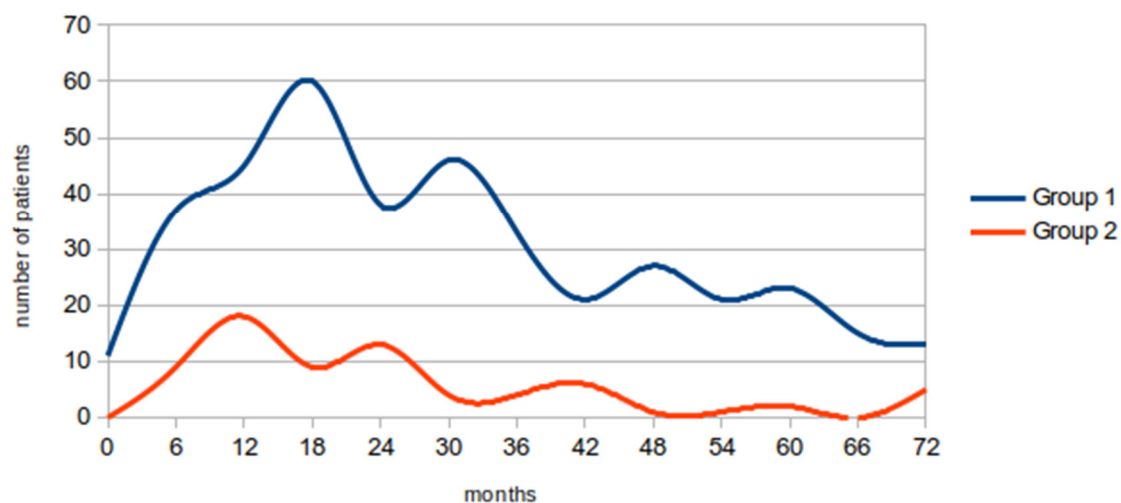

## General analysis of group 1

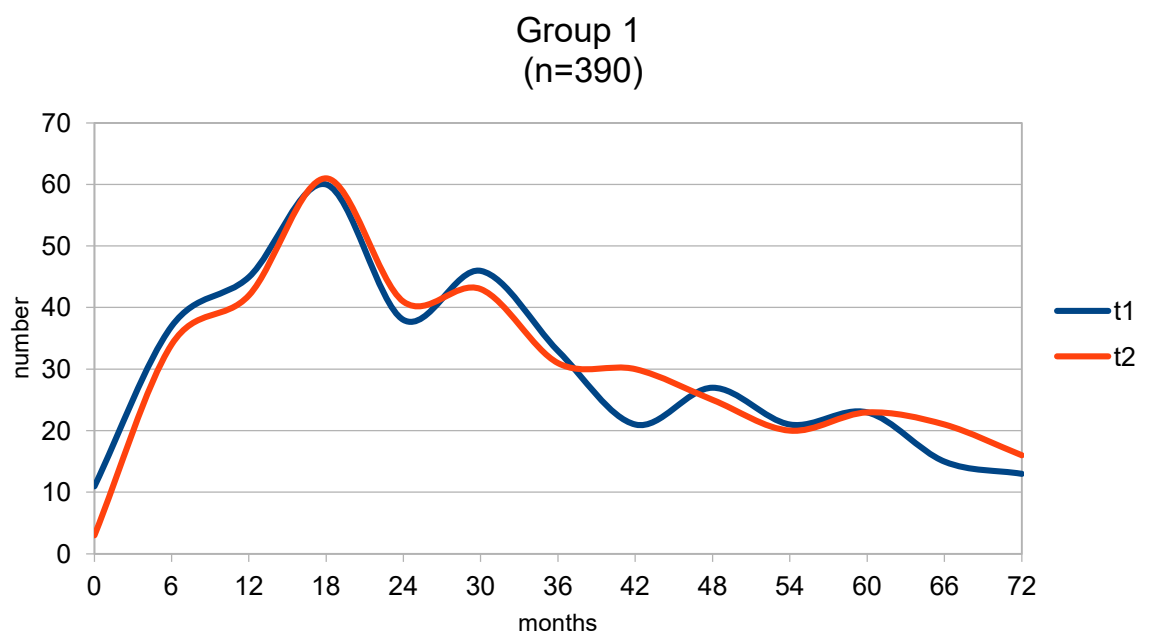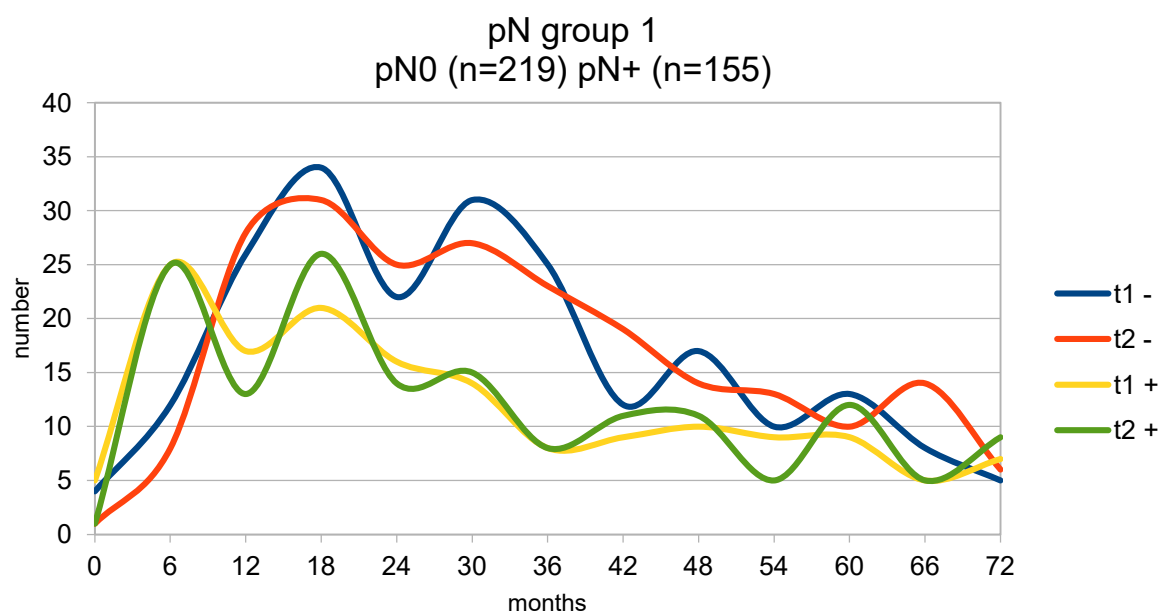

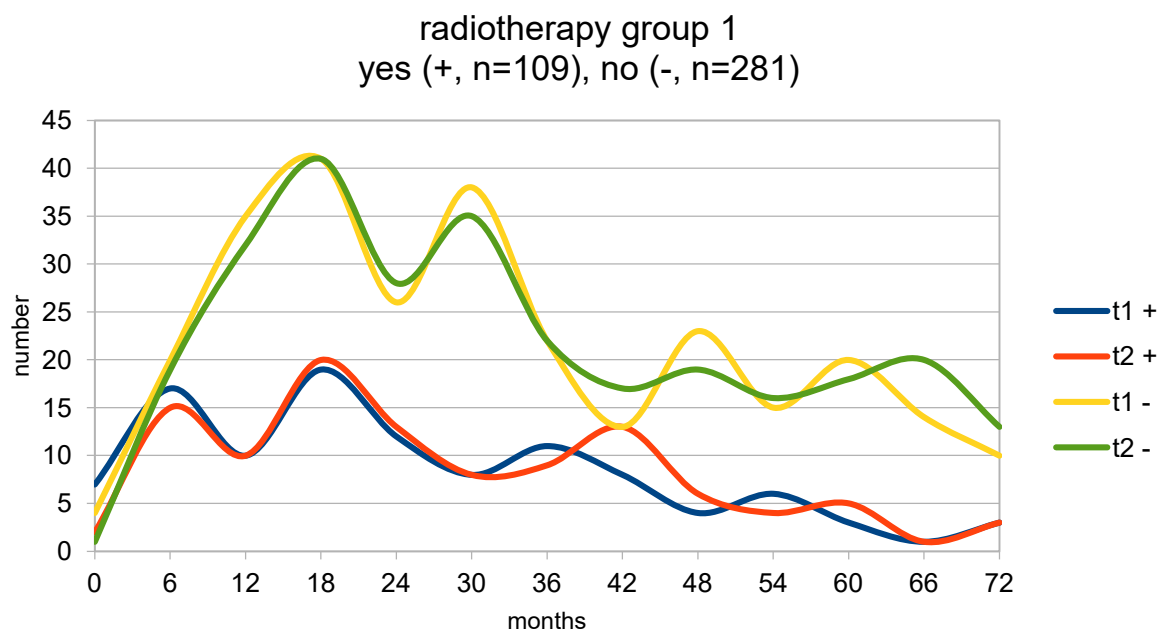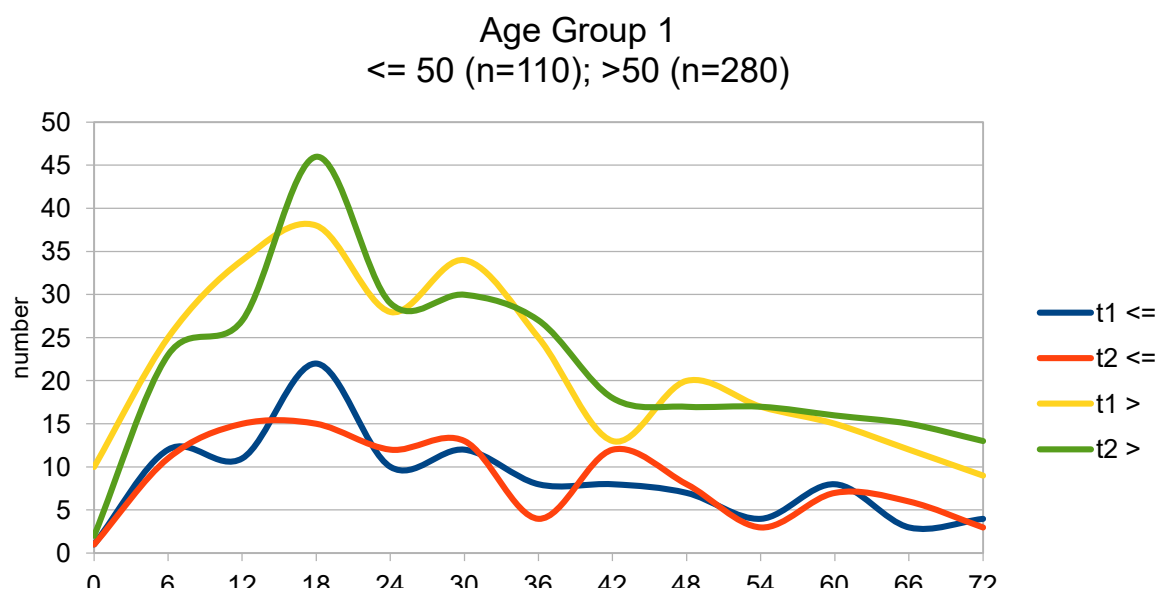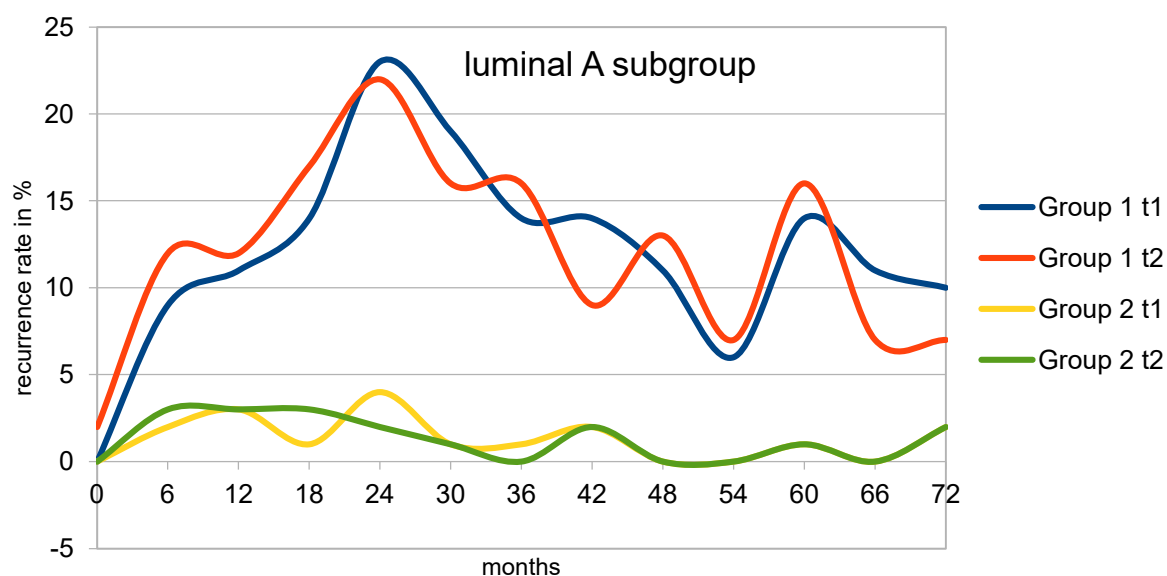

Subgroup analysis of the recurrence rates



## TNBC subgroup

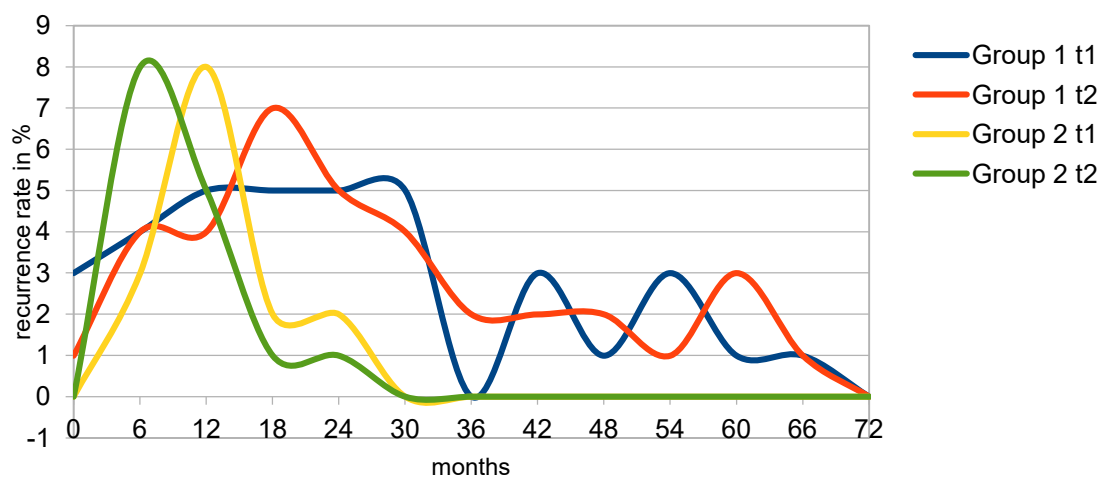

## HER2+ subgroup

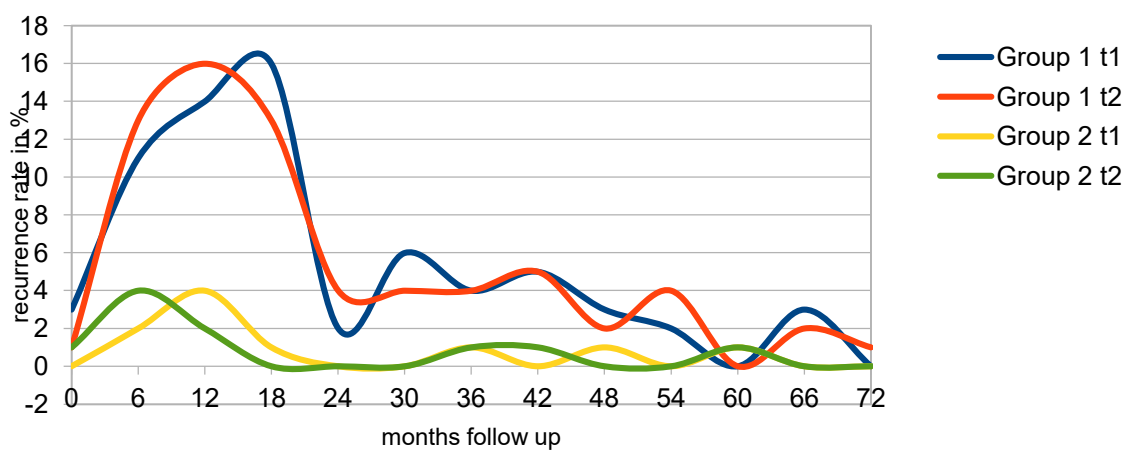

## luminal B HER2+ subgroup

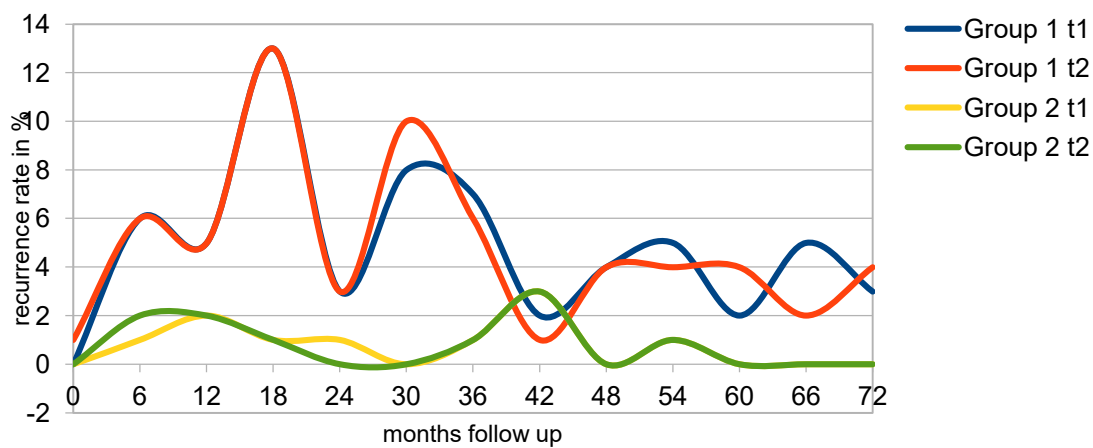

## luminal B HER2- subgroup

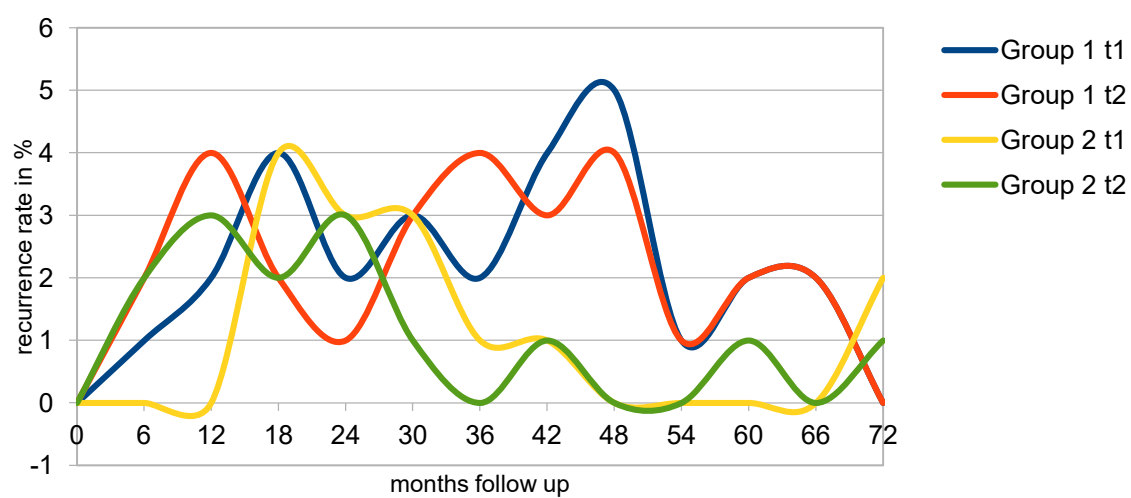

## General analysis of group 2

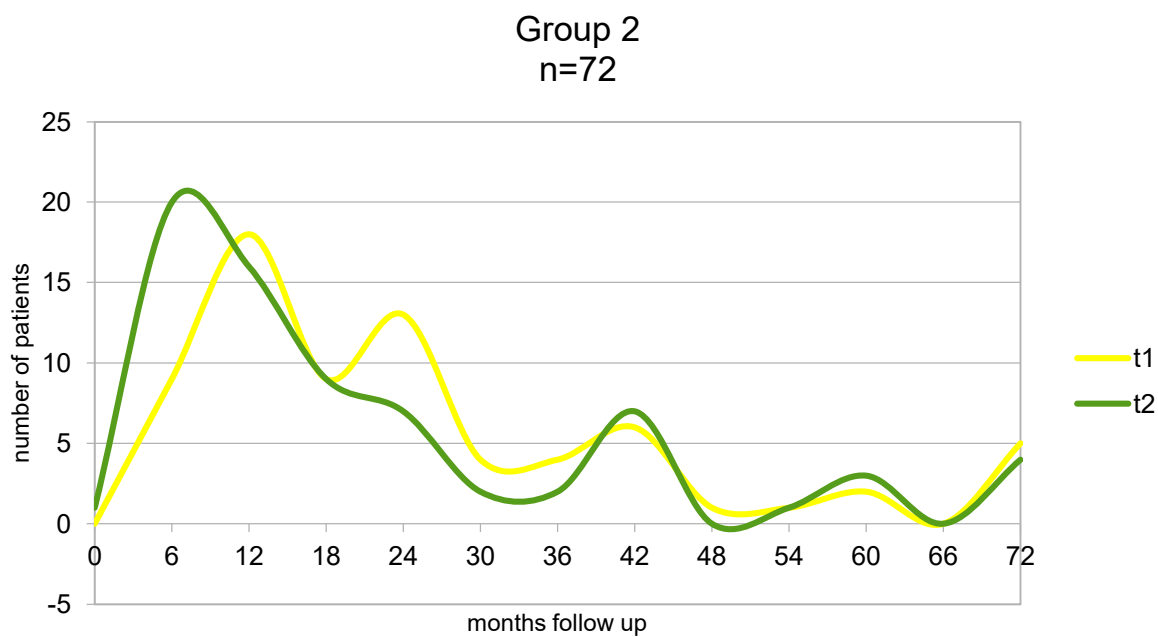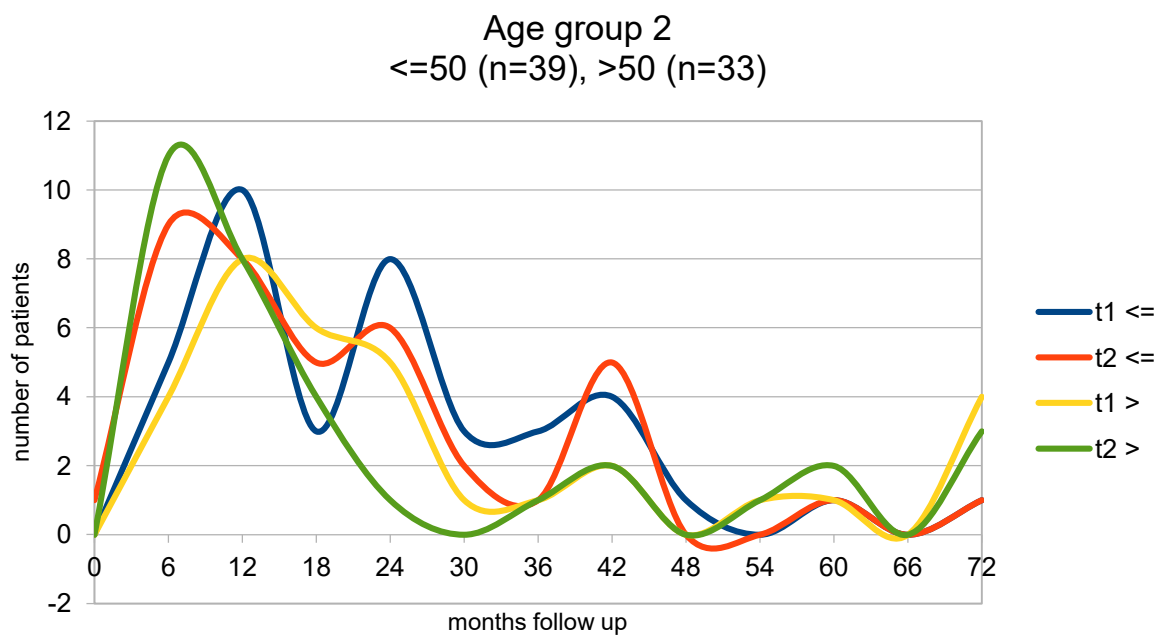

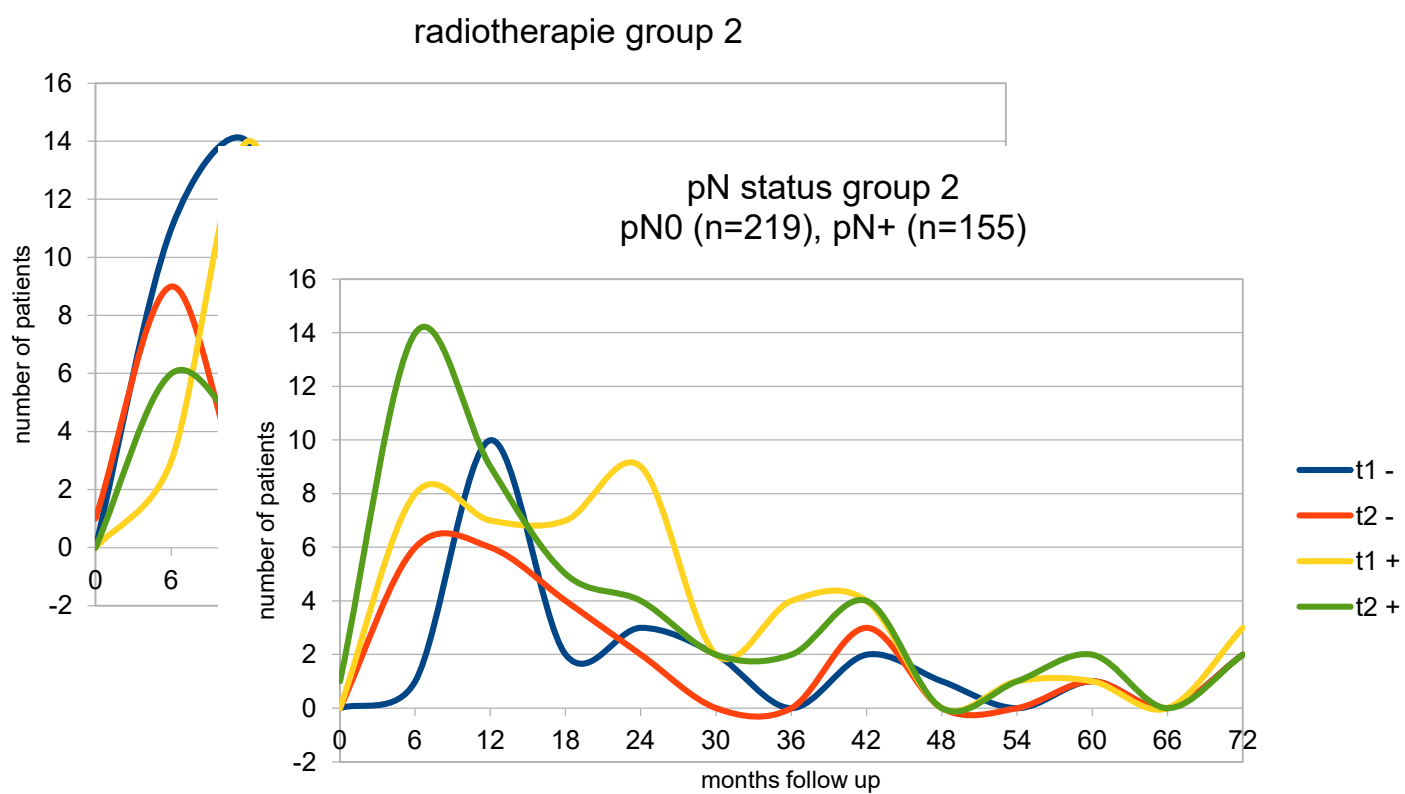

Supplement: s1 [file s1]
